# Supplementary material for: Perceived Facilitators and Barriers to Nigerian Nurses’ Engagement in Health Promoting Behaviors: A Socio-Ecological Model Approach
Source: Int J Environ Res Public Health. 2020 Feb 18;17(4):1314. doi: 10.3390/ijerph17041314 (PMC7068510; doi:10.3390/ijerph17041314)
Supplement: Supplementary file 1 [file ijerph-17-01314-s001.pdf]

Supplementary file 1: Interview guide for semi-structured interviews on perceived facilitators and barriers to Nigeria nurses engagement in health promoting behaviors (HPBs).

### **INTRODUCTORY QUESTIONS**

\*\*\* Think about your daily activities, how would you describe your \_\_\_\_\_ behaviours?

**Probes:** Ask specifically for

- Dietary behaviours
- Physical activity behaviors
- Alcohol consumption behaviors
- Smoking behaviours

Ask about above mentioned behaviors

- At work
- Outside of work

(If engaging in healthy behaviours) ask the following question for the healthy eating and physical activity.

\*\*\*Can you explain to me how regularly or frequently you engage in healthy eating/physical activity?

### **FACILITATORS FOR NURSES ENGAGEMENT IN HPBs**

\*\*\*Think about the healthy choices you mentioned that you make in \_\_\_\_\_ (named healthy behaviour). Can you tell me about the factors that encourage you to make the healthy choices in \_\_\_\_\_ behaviours?

**Probes:**

Ask specifically for facilitators for

- healthy eating
- Physical activity
- Non-risky alcohol behaviours
- Non-smoking behaviours

(adapt as applicable to respondent)

\*\*\*Can you explain how \_\_\_\_\_ factor (named facilitator) positively affects you?

**Probes:**

Ask specifically for facilitators for

- healthy eating
- Physical activity
- Non-risky alcohol behaviours
- Non-smoking behaviours

(adapt as applicable to respondent)

Ask about facilitators

- At work
- Outside of work.

\*\*\* Tell me of anything you feel would further encourage you (or make it easier for you) to adopt healthy behaviours?

**Probes:**

Ask specifically for

- healthy eating
- Physical activity
- Non-risky alcohol behaviours
- Non-smoking behaviours

*(adapt as applicable to respondent)*

*Consider facilitators:*

- *At work*
- *Outside of work.*
- 

### **BARRIERS TO NURSES ENGAGEMENT IN HBPs.**

\*\*\*Think about the health promoting behaviours (Probe: Mention specific HPB as applicable) you previously said you were not practicing (adequately/regularly). Could you describe what you feel prevents you from engaging in \_\_\_\_ (named behaviour(s))?

**Probes:**

*Ask specifically for*

- *healthy eating*
- *Physical activity*
- *Non-risky alcohol behaviours*
- *Non-smoking behaviours*

*Ask about above mentioned health promoting behaviours*

- *At work*
- *Outside of work.*

\*\*\*How would you explain the challenges you encounter (or mentioned) regarding taking part in \_\_\_\_\_ (Probe: Mention specific HPB as applicable).

**Probe:** How does the barrier make it difficult or impossible to make healthy choices sometimes or regularly?

\*\*\*Can you tell me about any changes you perceive would help to eliminate or reduce the impact of (named barrier)?

**Probe:** Repeat question but adapt to elicit information for other barriers mentioned by respondent.

\*\*\*Suppose \_\_\_\_ (named barrier) is reduced or removed, do you feel it would improve your engagement in \_\_\_\_ (named HPB)? In what ways would your behaviours in \_\_\_\_ (named HPB) be improved?

\*\*\* What sort of programs or interventions do you feel might be helpful for improving your behaviours related to \_\_\_\_\_ (Probe: Mention specific HPB as applicable)?

### **CLOSING QUESTIONS**

\*\*\*Would you like to provide any additional information you feel might be relevant that we have not discussed in the course of this interview?
